# Supplementary figures and images for: In Vitro Antibiofilm Activity of Resveratrol against Aeromonas hydrophila
Source: MDPI journal article supplement (doi:10.3390/antibiotics12040686), 2023-03-31

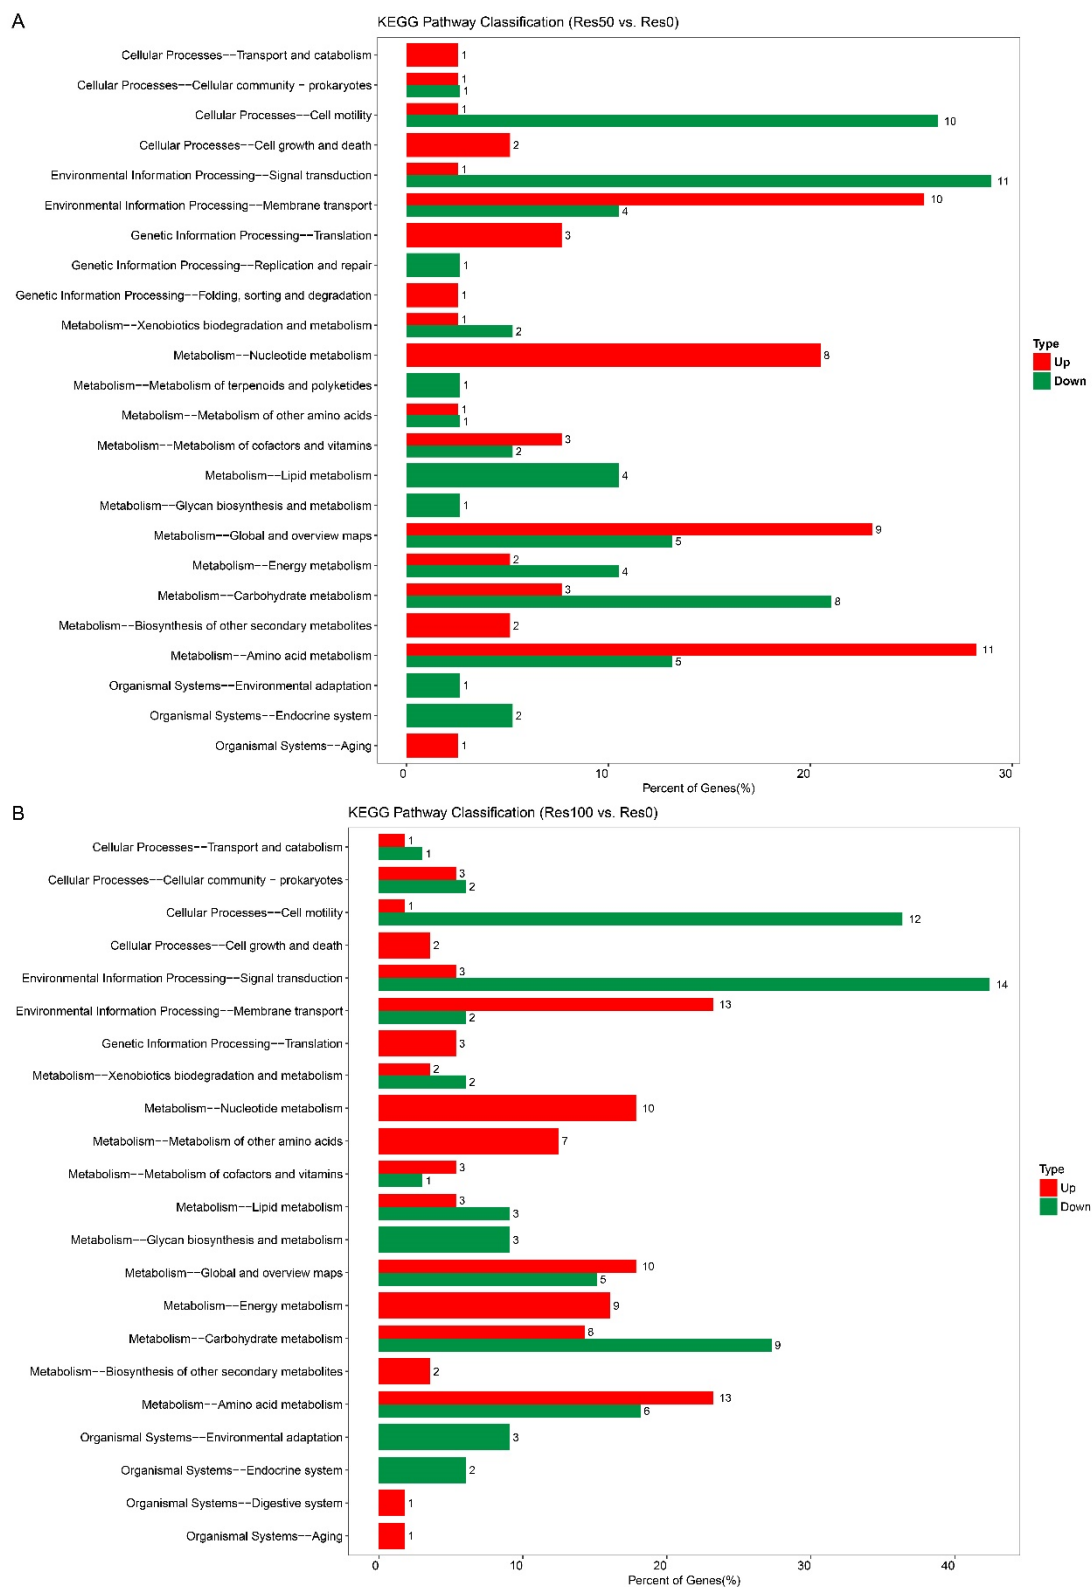

Figure S1. KEGG pathway classification. (A) Res 50 vs. Res 0 groups. (B) Res 100 vs. Res 0 groups.

Supplement: s1 [file s1]
